# Supplementary material for: Preoperative Neutrophil-Platelet Ratio as a Predictor of Acute Kidney Injury after Total Aortic Arch Replacement: A Retrospective Cohort Study
Source: Research Square preprint supplement (doi:10.21203/rs.3.rs-7221153/v1), 2025-09-22
Supplement: Supplementary file 1 [file f81898c73198b342ea81a6c2.docx]

**Model Fit Measures**

| Model | Deviance | AIC | BIC | McFadden's R² | Cox & Snell's R² | Nagelkerke's R² |
| --- | --- | --- | --- | --- | --- | --- |
| 1 | 472.6356 | 488.6356 | 520.4869 | 0.129809 | 0.1630924 | 0.2185374 |
